# Supplementary material for: Tumor-originated exosomal lncUEGC1 as a circulating biomarker for early-stage gastric cancer
Source: PubMed Central journal article supplement (PMC5978993; doi:10.1186/s12943-018-0834-9), 2018-04-24
Supplement: 12943_2018_834_MOESM6_ESM.pdf [file 12943_2018_834_MOESM6_ESM.pdf]

**Table S4. Performance of CEA, IncUEGC1 and IncUEGC2 levels in the classification of GC and Healthy subsets, Stage I and Healthy subsets, Stage I and CAG subsets.**

| <b>Comparison</b>         | <b>AUC [95% CI]</b>        | <b>P-value</b> | <b>Sens</b> | <b>Spec</b> | <b>Acc</b> |
|---------------------------|----------------------------|----------------|-------------|-------------|------------|
| <b>GC vs Healthy</b>      |                            |                |             |             |            |
| CEA                       | 0.6614<br>[0.5574, 0.7655] | 0.0035         | 49.02%      | 81.67%      | 66.67%     |
| IncUEGC1                  | 0.8760<br>[0.8035, 0.9484] | < 0.0001       | 88.24%      | 83.33%      | 85.59%     |
| IncUEGC2                  | 0.7582<br>[0.6678, 0.8485] | < 0.0001       | 90.20%      | 56.67%      | 72.07%     |
| <b>Stage I vs Healthy</b> |                            |                |             |             |            |
| CEA                       | 0.6424<br>[0.4969, 0.7879] | 0.0456         | 73.91%      | 55.00%      | 60.24%     |
| IncUEGC1                  | 0.8500<br>[0.7650, 0.9350] | < 0.0001       | 95.65%      | 73.33%      | 79.52%     |
| IncUEGC2                  | 0.7486<br>[0.6438, 0.8533] | 0.0005         | 73.91%      | 71.67%      | 72.29%     |
| <b>Stage I vs CAG</b>     |                            |                |             |             |            |
| CEA                       | 0.6123<br>[0.4372, 0.7874] | 0.2219         | 73.91%      | 55.56%      | 65.85%     |
| IncUEGC1                  | 0.8406<br>[0.7064, 0.9747] | 0.0002         | 73.91%      | 88.89%      | 80.49%     |
| IncUEGC2                  | 0.6522<br>[0.4836, 0.8207] | 0.0980         | 73.91%      | 55.56%      | 65.85%     |

Abbreviation: CI, confidence interval; Sens, sensitivity; Spec, specificity; Acc, overall accuracy.
