# Supplementary material for: Tumor-originated exosomal lncUEGC1 as a circulating biomarker for early-stage gastric cancer
Source: Springer Nature journal article supplement (doi:10.1186/s12943-018-0834-9), 2018-04-24
Supplement: MOESM1 [file 15716610]

**Table S1. Clinical characteristics of patients and healthy individuals of all sets.**

| Categories       | Testing set (n=15) |           |                              | Validation set (n=129) |           |                              |            |                              |
|------------------|--------------------|-----------|------------------------------|------------------------|-----------|------------------------------|------------|------------------------------|
|                  | Healthy (n=5)      | GC (n=10) | <i>P</i> -value <sup>a</sup> | Healthy (n=60)         | GC (n=51) | <i>P</i> -value <sup>a</sup> | CAG (n=18) | <i>P</i> -value <sup>a</sup> |
| Age(years)       | 57.2±6.8           | 59.4±10.8 | 0.687                        | 58.3±8.6               | 61.1±9.8  | 0.108                        | 59.1±6.4   | 0.708                        |
| Gender n(%)      |                    |           |                              |                        |           |                              |            |                              |
| Male             | 4(80.0)            | 8(80.0)   | 1.000                        | 38(63.3)               | 31(60.8)  | 0.846                        | 13(72.2)   | 0.580                        |
| Female           | 1(20.0)            | 2(20.0)   |                              | 22(36.7)               | 20(39.2)  |                              | 5(27.8)    |                              |
| Tumor stage n(%) |                    |           |                              |                        |           |                              |            |                              |
| Ia               |                    | 8(80.0)   |                              |                        | 16(31.4)  |                              |            |                              |
| Ib               |                    | 2(20.0)   |                              |                        | 7(13.7)   |                              |            |                              |
| IIa              |                    | 0         |                              |                        | 15(29.4)  |                              |            |                              |
| IIb              |                    | 0         |                              |                        | 13(25.5)  |                              |            |                              |

Abbreviation: GC, gastric cancer; CAG, chronic atrophic gastritis;

<sup>a</sup>Compared to Healthy group.
