# Supplementary material for: Tumor-originated exosomal lncUEGC1 as a circulating biomarker for early-stage gastric cancer
Source: Springer Nature journal article supplement (doi:10.1186/s12943-018-0834-9), 2018-04-24
Supplement: MOESM2 [file 15716610]

# Figure S1

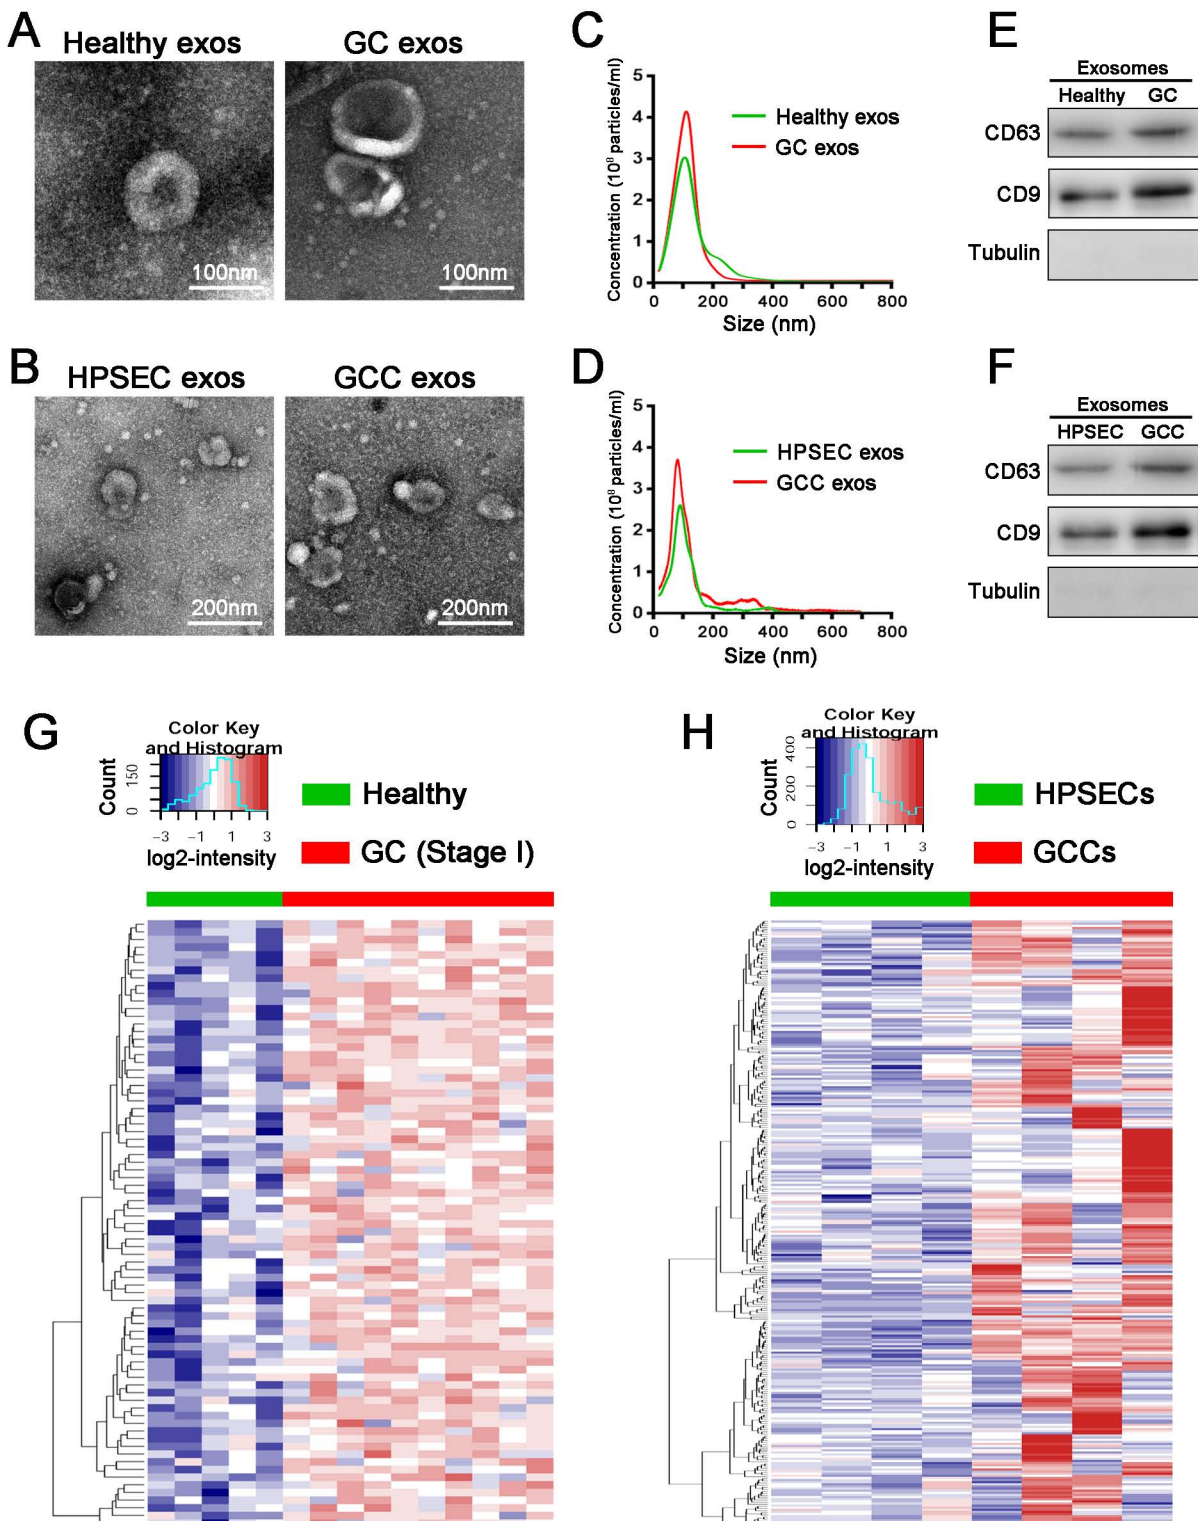

Figure S1. Characterization and quantification of exosome levels and heatmap of the up-regulated exosomal lncRNAs and mRNAs identified in the screening. (A) Transmission electron microscopy (TEM) revealed the phenotype of exosomes isolated from stage I GC patient and healthy control plasma samples. Scale bar, 100 nm. (B) TEM revealed the phenotype of exosomes isolated from GCC and HPSEC culture media. Scale bar, 200 nm. (C and D) NanoSight particle tracking analysis of the size distributions and number of exosomes isolated from stage I GC patient and healthy control plasma samples (C) and isolated from GCC and HPSEC culture media (D). (E and F) Western blot showing the presence of specific exosome marker proteins (CD9 and CD63) and the absence of tubulin in exosomes derived from stage I GC patient and healthy control plasma samples (E) and derived from GCC and HPSEC culture media (F). (G) Heatmap of the 79 up-regulated exosomal lncRNAs and mRNAs between the plasma samples of stage I GC patients (n=10) and healthy controls (n=5). (H) Heatmap of the 285 up-regulated exosomal lncRNAs and mRNAs between GCC (n=4) and HPSEC (n=4) culture media.
