# Supplementary material for: Tumor-originated exosomal lncUEGC1 as a circulating biomarker for early-stage gastric cancer
Source: Springer Nature journal article supplement (doi:10.1186/s12943-018-0834-9), 2018-04-24
Supplement: MOESM5 [file 15716610]

Figure S2

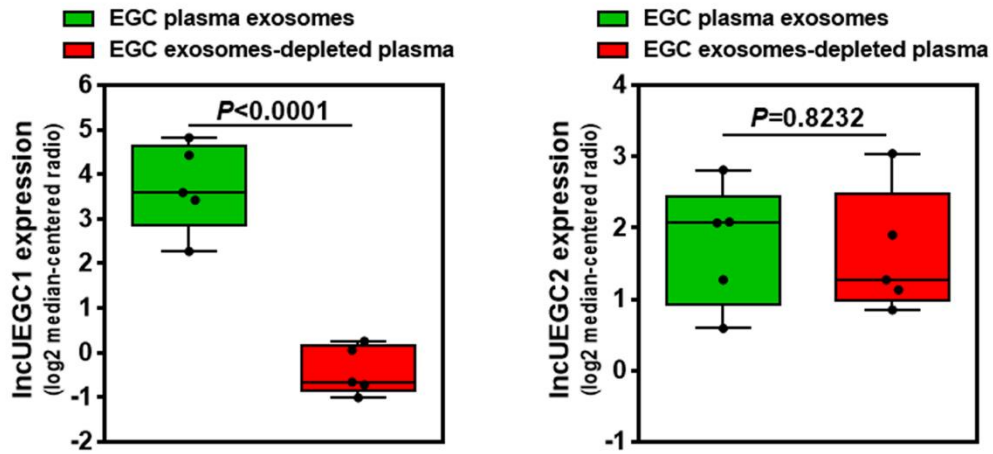

Figure S2. qPCR analysis of the relative lncUEGC1 and lncUEGC2 levels in exosomes and exosomes-depleted plasma from stage I and II GC patients (n=5). Differences with  $P < 0.05$  were considered statistically significant.
