# Supplementary material for: Tumor-originated exosomal lncUEGC1 as a circulating biomarker for early-stage gastric cancer
Source: Mol Cancer. 2018 Apr 24;17:84. doi: 10.1186/s12943-018-0834-9 (PMC5978993; doi:10.1186/s12943-018-0834-9)
Supplement: Supplementary file 4 — Table S3. Two hundred eighty-five exosomal lncRNAs and mRNAs up-regulated by more than 2-fold in culture medium from GCCs (n = 4) compared with HPSECs (n = 4) (Q < 0.00001). (XLSX 47 kb) [file 12943_2018_834_MOESM4_ESM.xlsx]

## Sheet: Table S2
gene	gene_type	Position	Strand	HPSECs	GCCs	log2(Fold_change)	p-value	q-value	Description	Website
ABCD1P3	pseudogene	chr16:32486144-32487128	-	6.2747	22.2247	1.82455	5.41456e-09	2.81193e-07	ATP binding cassette subfamily D member 1 pseudogene 3	http://www.ncbi.nlm.nih.gov/gene/?term=26982
ACTRT2	protein_coding	chr1:2938046-2939467	+	7.95841	18.3931	1.20861	3.65623e-08	1.58517e-06	actin related protein T2	http://www.ncbi.nlm.nih.gov/gene/?term=140625
ALOX15B	protein_coding	chr17:7942358-7952452	+	7.14116	14.8168	1.05301	2.74042e-08	1.21861e-06	arachidonate 15-lipoxygenase, type B	http://www.ncbi.nlm.nih.gov/gene/?term=247
AMN	protein_coding	chr14:103388993-103397179	+	8.05066	18.2414	1.18004	1.95488e-07	7.11509e-06	amnion associated transmembrane protein	http://www.ncbi.nlm.nih.gov/gene/?term=81693
ANP32B	protein_coding	chr9:100745489-100778225	+	87.9319	304.262	1.79085	2.22045e-16	3.60195e-14	acidic nuclear phosphoprotein 32 family member B	http://www.ncbi.nlm.nih.gov/gene/?term=10541
ANXA13	protein_coding	chr8:124693034-124749666	-	5.51915	32.708	2.56712	0	0	annexin A13	http://www.ncbi.nlm.nih.gov/gene/?term=312
AQP12A	protein_coding	chr2:241631262-241637900	+	3.46015	12.5699	1.86107	2.38769e-08	1.07166e-06	aquaporin 12A	http://www.ncbi.nlm.nih.gov/gene/?term=375318
ARHGAP11A	protein_coding	chr15:32907345-32932138	+	17.6408	47.6065	1.43225	2.22045e-16	3.60195e-14	Rho GTPase activating protein 11A	http://www.ncbi.nlm.nih.gov/gene/?term=9824
ARRDC2	protein_coding	chr19:18111941-18124911	+	10.7564	24.0907	1.16327	2.71168e-14	1.2952e-12	arrestin domain containing 2	http://www.ncbi.nlm.nih.gov/gene/?term=27106
ASPDH	protein_coding	chr19:51014857-51017947	-	5.739	15.6001	1.44268	2.77172e-08	1.23001e-06	aspartate dehydrogenase domain containing	http://www.ncbi.nlm.nih.gov/gene/?term=554235
ASZ1	protein_coding	chr7:117003276-117067577	-	3.03871	12.5106	2.04162	3.61178e-11	2.86508e-09	ankyrin repeat, SAM and basic leucine zipper domain containing 1	http://www.ncbi.nlm.nih.gov/gene/?term=136991
ATAD2	protein_coding	chr8:124332090-124408705	-	5.33217	19.399	1.86319	1.30679e-14	7.26542e-12	ATPase family, AAA domain containing 2	http://www.ncbi.nlm.nih.gov/gene/?term=29028
BCL2L2	protein_coding	chr14:23775971-23780968	+	11.8893	52.8433	2.15206	0	0	BCL2 like 2	http://www.ncbi.nlm.nih.gov/gene/?term=599
BCL2L2-PABPN1	protein_coding	chr14:23775971-23795394	+	9.88575	24.0971	1.28544	5.71727e-14	3.22178e-11	BCL2L2-PABPN1 readthrough	http://www.ncbi.nlm.nih.gov/gene/?term=100529063
BMS1P8	pseudogene	chr16:33485634-33504599	-	5.06257	11.3535	1.1652	7.36148e-13	4.16364e-10	BMS1, ribosome biogenesis factor pseudogene 8	http://www.ncbi.nlm.nih.gov/gene/?term=653557
BRI3	protein_coding	chr7:97910979-97922275	+	15.8507	33.7382	1.08984	1.45777e-08	6.85547e-07	brain protein I3	http://www.ncbi.nlm.nih.gov/gene/?term=25798
C19orf33	protein_coding	chr19:38794801-38795646	+	15.7737	71.2729	2.17584	0	0	chromosome 19 open reading frame 33	http://www.ncbi.nlm.nih.gov/gene/?term=64073
C19orf68	protein_coding	chr19:48673949-48700877	+	17.8263	52.7902	1.56626	0	0	zinc finger SWIM-type containing 9	http://www.ncbi.nlm.nih.gov/gene/?term=374920
C22orf46	protein_coding	chr22:42086547-42094140	+	21.8568	82.2662	1.91222	2.22045e-16	3.60195e-14	chromosome 22 open reading frame 46	http://www.ncbi.nlm.nih.gov/gene/?term=79640
C8orf76	protein_coding	chr8:124232196-124253638	-	6.78708	28.9743	2.09391	0	0	chromosome 8 open reading frame 76	http://www.ncbi.nlm.nih.gov/gene/?term=84933
CAPNS1	protein_coding	chr19:36630828-36641255	+	12.4423	30.0616	1.27266	1.90904e-15	1.88709e-13	calpain small subunit 1	http://www.ncbi.nlm.nih.gov/gene/?term=826
CAPZA2	protein_coding	chr7:116502563-116559313	+	6.24562	21.779	1.80202	2.30249e-16	2.30979e-14	capping actin protein of muscle Z-line alpha subunit 2	http://www.ncbi.nlm.nih.gov/gene/?term=830
CAV1	protein_coding	chr7:116164839-116201239	+	16.8463	50.5673	1.58577	2.51484e-15	2.52532e-13	caveolin 1	http://www.ncbi.nlm.nih.gov/gene/?term=857
CAV2	protein_coding	chr7:116139655-116148595	+	7.1442	34.7254	2.28115	0	0	caveolin 2	http://www.ncbi.nlm.nih.gov/gene/?term=858
CCND1	protein_coding	chr11:69455873-69469242	+	11.5658	52.6549	2.18671	0	0	cyclin D1	http://www.ncbi.nlm.nih.gov/gene/?term=595
CCT8L2	protein_coding	chr22:17071648-17073700	-	6.61819	15.5996	1.237	9.55433e-09	4.70782e-07	chaperonin containing TCP1 subunit 8 like 2	http://www.ncbi.nlm.nih.gov/gene/?term=150160
CD24P4	pseudogene	chrY:21152526-21154704	-	7.84905	19.5631	1.31754	9.41962e-14	7.37389e-11	CD24 molecule pseudogene 4	http://www.ncbi.nlm.nih.gov/gene/?term=938
CDC42BPG	protein_coding	chr11:64591661-64612041	-	12.6409	42.2681	1.74147	1.13545e-13	7.63067e-10	CDC42 binding protein kinase gamma	http://www.ncbi.nlm.nih.gov/gene/?term=55561
CDK5P1	pseudogene	chr8:123781468-123782557	+	9.69139	40.0095	2.04557	0	0	cyclin dependent kinase 5 pseudogene 1	http://www.ncbi.nlm.nih.gov/gene/?term=392265
CEBPA-AS1	lncRNA	chr19:33793763-33795963	+	8.07406	24.0044	1.57194	9.79128e-13	6.60003e-10	CEBPA antisense RNA 1 (head to head)	http://www.ncbi.nlm.nih.gov/gene/?term=80054
CENPB	protein_coding	chr20:3764498-3767337	-	22.7707	66.8924	1.55466	1.20313e-12	8.32804e-09	centromere protein B	http://www.ncbi.nlm.nih.gov/gene/?term=1059
CFTR	protein_coding	chr7:117120017-117308719	+	5.37796	17.8592	1.73154	2.91367e-15	4.72339e-12	cystic fibrosis transmembrane conductance regulator	http://www.ncbi.nlm.nih.gov/gene/?term=1080
CHAF1A	protein_coding	chr19:4402660-4443394	+	13.816	29.0241	1.07091	1.47128e-12	2.01455e-10	chromatin assembly factor 1 subunit A	http://www.ncbi.nlm.nih.gov/gene/?term=10036
CHD3	protein_coding	chr17:7788123-7816075	+	9.30092	20.751	1.15773	8.36025e-12	8.39286e-09	chromodomain helicase DNA binding protein 3	http://www.ncbi.nlm.nih.gov/gene/?term=1107
CLSPN	protein_coding	chr1:36185819-36235551	-	8.09338	17.193	1.08701	2.21763e-11	1.03074e-08	claspin	http://www.ncbi.nlm.nih.gov/gene/?term=63967
COL14A1	protein_coding	chr8:121137347-121385814	+	5.50051	15.0755	1.45457	2.9572e-12	2.55543e-09	collagen type XIV alpha 1 chain	http://www.ncbi.nlm.nih.gov/gene/?term=7373
COLEC10	protein_coding	chr8:119964406-120120694	+	5.19851	16.76	1.68885	3.85716e-10	3.41903e-07	collectin subfamily member 10	http://www.ncbi.nlm.nih.gov/gene/?term=10584
CRCP	protein_coding	chr7:65579805-65619555	+	7.36771	21.0363	1.5136	5.76285e-12	3.50643e-09	CGRP receptor component	http://www.ncbi.nlm.nih.gov/gene/?term=27297
CRIP1	protein_coding	chr14:105953257-105955126	+	16.3787	62.3527	1.92863	7.02882e-13	5.79716e-09	cysteine rich protein 1	http://www.ncbi.nlm.nih.gov/gene/?term=1396
CRTAP	protein_coding	chr3:33155450-33189265	+	16.5666	37.5096	1.17898	2.22045e-16	3.60195e-14	cartilage associated protein	http://www.ncbi.nlm.nih.gov/gene/?term=10491
CST1	protein_coding	chr20:23728190-23731574	-	11.0215	61.6727	2.48431	0	0	cystatin SN	http://www.ncbi.nlm.nih.gov/gene/?term=1469
CTBP2P7	pseudogene	chr19:36987618-36989165	-	4.82831	13.4925	1.48257	4.19893e-09	2.23695e-07	C-terminal binding protein 2 pseudogene 7	http://www.ncbi.nlm.nih.gov/gene/?term=401914
CTNNB1	protein_coding	chr3:41240915-41281944	+	10.9881	26.8762	1.29038	1.14092e-13	5.87994e-10	catenin beta 1	http://www.ncbi.nlm.nih.gov/gene/?term=1499
DDX11L5	misc_RNA	chr9:11987-14525	+	4.19907	13.315	1.66491	9.23859e-11	6.61391e-09	DEAD/H-box helicase 11 like 5	http://www.ncbi.nlm.nih.gov/gene/?term=100287596
DEPTOR	protein_coding	chr8:120885895-121063157	+	6.68405	25.0042	1.90338	0	0	DEP domain containing MTOR interacting protein	http://www.ncbi.nlm.nih.gov/gene/?term=64798
DERL1	protein_coding	chr8:124025404-124054663	-	7.96359	35.5349	2.15775	0	0	derlin 1	http://www.ncbi.nlm.nih.gov/gene/?term=79139
DGCR6	protein_coding	chr22:18893736-18899601	+	8.65964	21.1358	1.28731	1.35695e-08	6.45848e-07	DiGeorge syndrome critical region gene 6	http://www.ncbi.nlm.nih.gov/gene/?term=8214
DGKZP1	pseudogene	chr13:44542459-44545846	+	2.2176	8.03573	1.85743	2.22045e-16	3.60195e-14	diacylglycerol kinase zeta pseudogene 1	http://www.ncbi.nlm.nih.gov/gene/?term=400126
DHRS12	protein_coding	chr13:52342129-52378298	-	4.73982	10.8689	1.1973	2.1225e-08	9.62614e-07	dehydrogenase/reductase 12	http://www.ncbi.nlm.nih.gov/gene/?term=79758
DNM1P18	pseudogene	chr22:43183414-43184590	-	8.32287	18.9055	1.18365	3.37253e-08	1.47547e-06	dynamin 1 pseudogene 18	http://www.ncbi.nlm.nih.gov/gene/?term=387553
DSCC1	protein_coding	chr8:120846181-120868170	-	3.59413	15.5256	2.11094	0	0	DNA replication and sister chromatid cohesion 1	http://www.ncbi.nlm.nih.gov/gene/?term=79075
DUSP22	protein_coding	chr6:292057-351355	+	9.83906	22.2106	1.17465	1.5462e-12	6.01878e-09	dual specificity phosphatase 22	http://www.ncbi.nlm.nih.gov/gene/?term=56940
DUX4L4	pseudogene	chr4:191002273-191003551	+	0	5.79747	Inf	7.84972e-12	7.08306e-10	double homeobox 4 like 4	http://www.ncbi.nlm.nih.gov/gene/?term=441056
DUX4L8	pseudogene	chr4:190989090-190990374	+	0.112743	4.64725	5.36527	1.45998e-08	6.85802e-07	double homeobox 4 like 8	http://www.ncbi.nlm.nih.gov/gene/?term=26583
DYNC1LI2	protein_coding	chr16:66754796-66785731	-	13.9977	37.1684	1.40888	3.0161e-16	2.26388e-14	dynein cytoplasmic 1 light intermediate chain 2	http://www.ncbi.nlm.nih.gov/gene/?term=1783
DYNLL1P2	pseudogene	chr14:81879203-81879783	+	0.151668	11.9085	6.29493	3.01847e-11	2.41211e-09	dynein light chain LC8-type 1 pseudogene 2	http://www.ncbi.nlm.nih.gov/gene/?term=731308
DYNLL2	protein_coding	chr17:56160780-56167618	+	11.6446	23.324	1.00216	7.65136e-08	3.07417e-06	dynein light chain LC8-type 2	http://www.ncbi.nlm.nih.gov/gene/?term=140735
ECM2	protein_coding	chr9:95255829-95298374	-	3.18685	7.6216	1.25796	8.26013e-08	3.29432e-06	extracellular matrix protein 2	http://www.ncbi.nlm.nih.gov/gene/?term=1842
ENPP2	protein_coding	chr8:120569317-120685816	-	5.86968	18.9075	1.6876	5.6479e-14	3.47388e-11	ectonucleotide pyrophosphatase/phosphodiesterase 2	http://www.ncbi.nlm.nih.gov/gene/?term=5168
ENSG00000179859.7	antisense	chr17:7816642-7819271	-	3.97087	10.0239	1.33592	1.39925e-09	8.15669e-08	None	http://asia.ensembl.org/Homo_sapiens/Gene/Idhistory?g=ENSG00000179859
ENST00000378432.1	sense_intronic	chr19:40779396-40781386	-	9.0898	41.0811	2.17616	3.54242e-12	2.3072e-10	None	http://asia.ensembl.org/Homo_sapiens/Gene/Idhistory?g=ENSG00000205041
ENSG00000223432.1	lincRNA	chr10:123374939-123375353	-	5.46838	101.424	4.21315	0	0	None	http://asia.ensembl.org/Homo_sapiens/Gene/Idhistory?g=ENSG00000223432
ENSG00000225872.2	lincRNA	chr19:36279778-36288787	-	10.012	20.9655	1.06628	8.93952e-13	9.04646e-11	None	http://asia.ensembl.org/Homo_sapiens/Gene/Idhistory?g=ENSG00000225872
ENSG00000227143.1	lincRNA	chr10:122938214-122945480	+	5.95319	109.713	4.20392	0	0	None	http://asia.ensembl.org/Homo_sapiens/Gene/Idhistory?g=ENSG00000227143
ENSG00000234449.2	lincRNA	chrX:3771051-3800358	-	0.212122	1.83493	3.11276	6.21436e-08	2.54161e-06	None	http://asia.ensembl.org/Homo_sapiens/Gene/Idhistory?g=ENSG00000234449
ENSG00000238261.5	lincRNA	chr1:143377281-143401533	+	2.18853	5.55281	1.34325	6.21743e-09	3.19063e-07	None	http://asia.ensembl.org/Homo_sapiens/Gene/Idhistory?g=ENSG00000238261
ENSG00000242686.2	antisense	chr4:646639-649434	-	7.91351	17.2265	1.12224	2.09982e-09	1.18575e-07	None	http://asia.ensembl.org/Homo_sapiens/Gene/Idhistory?g=ENSG00000242686
ENSG00000245330.4	lincRNA	chr8:120879659-120886728	-	10.3116	37.9522	1.87992	0	0	None	http://asia.ensembl.org/Homo_sapiens/Gene/Idhistory?g=ENSG00000245330
ENSG00000250519.2	lincRNA	chr11:93971316-94012372	+	11.8234	30.6342	1.3735	1.14713e-07	4.40075e-06	None	http://asia.ensembl.org/Homo_sapiens/Gene/Idhistory?g=ENSG00000250519
ENSG00000253258.1	antisense	chr8:124193878-124195028	-	8.56541	29.3193	1.77526	1.42109e-13	1.58226e-11	None	http://asia.ensembl.org/Homo_sapiens/Gene/Idhistory?g=ENSG00000253258
ENSG00000253286.1	antisense	chr8:124626465-124670810	+	11.0144	34.6833	1.65485	2.22045e-16	3.60195e-14	None	http://asia.ensembl.org/Homo_sapiens/Gene/Idhistory?g=ENSG00000253286
ENSG00000253372.1	sense_intronic	chr8:123819985-123828756	+	8.37367	24.0984	1.52501	6.82743e-12	6.22546e-10	None	http://asia.ensembl.org/Homo_sapiens/Gene/Idhistory?g=ENSG00000253372
ENSG00000253619.1	lincRNA	chr8:121925305-122131994	+	6.16026	17.6084	1.5152	1.46148e-08	6.85802e-07	None	http://asia.ensembl.org/Homo_sapiens/Gene/Idhistory?g=ENSG00000253619
ENSG00000253972.1	lincRNA	chr8:120227351-120259088	-	4.99711	14.8738	1.5736	1.68538e-10	1.16795e-08	None	http://asia.ensembl.org/Homo_sapiens/Gene/Idhistory?g=ENSG00000253972
ENSG00000254113.1	lincRNA	chr8:124575310-124581002	-	7.91615	40.1199	2.34145	0	0	None	http://asia.ensembl.org/Homo_sapiens/Gene/Idhistory?g=ENSG00000254113
ENSG00000254275.2	processed_transcript	chr8:129417515-129576925	-	10.0106	25.6372	1.35671	6.33239e-13	4.75014e-11	None	http://asia.ensembl.org/Homo_sapiens/Gene/Idhistory?g=ENSG00000254275
ENSG00000254303.1	lincRNA	chr8:122966879-123139423	-	6.85743	33.1685	2.27408	0	0	None	http://asia.ensembl.org/Homo_sapiens/Gene/Idhistory?g=ENSG00000254303
ENSG00000254339.1	lincRNA	chr8:115294296-115308068	+	5.62195	14.8136	1.39778	2.52868e-08	1.12793e-06	None	http://asia.ensembl.org/Homo_sapiens/Gene/Idhistory?g=ENSG00000254339
ENSG00000255364.1	lincRNA	chr8:123426571-123440790	-	2.64903	16.5877	2.64658	2.43139e-09	1.35882e-07	None	http://asia.ensembl.org/Homo_sapiens/Gene/Idhistory?g=ENSG00000255364
ENSG00000258858.1	antisense	chr14:105156428-105157621	-	6.41524	29.1987	2.18633	3.35731e-13	3.61721e-11	None	http://asia.ensembl.org/Homo_sapiens/Gene/Idhistory?g=ENSG00000258858
ENSG00000260465.1	antisense	chr16:66754800-66765688	+	8.12809	21.5499	1.40669	2.93099e-14	3.57597e-12	None	http://asia.ensembl.org/Homo_sapiens/Gene/Idhistory?g=ENSG00000260465
ENSG00000260872.1	antisense	chr16:15111963-15114345	-	7.38225	15.2161	1.04347	1.23564e-08	5.93324e-07	None	http://asia.ensembl.org/Homo_sapiens/Gene/Idhistory?g=ENSG00000260872
ENSG00000261200.1	lincRNA	chr16:33344309-33348279	-	31.9972	70.7073	1.14391	2.22045e-16	3.60195e-14	None	http://asia.ensembl.org/Homo_sapiens/Gene/Idhistory?g=ENSG00000261200
ENST00000568893.1	lincRNA	chr16:33350764-33356875	-	19.4376	152.583	2.97267	0	0	None	http://asia.ensembl.org/Homo_sapiens/Gene/Idhistory?g=ENSG00000261466
ENSG00000261618.1	lincRNA	chr8:79749764-79752757	+	2.53396	6.30062	1.3141	8.36671e-08	3.33069e-06	None	http://asia.ensembl.org/Homo_sapiens/Gene/Idhistory?g=ENSG00000261618
ENSG00000261655.1	sense_overlapping	chr8:142363503-142365465	-	8.23455	20.0523	1.28401	5.09237e-11	3.86949e-09	None	http://asia.ensembl.org/Homo_sapiens/Gene/Idhistory?g=ENSG00000261655
ENSG00000262877.3	lincRNA	chr17:79361930-79364056	-	7.45925	17.5669	1.23576	3.55987e-09	1.92491e-07	None	http://asia.ensembl.org/Homo_sapiens/Gene/Idhistory?g=ENSG00000262877
ENSG00000263443.1	lincRNA	chr8:123712508-123715662	-	7.598	26.1827	1.78492	5.8295e-08	2.40007e-06	None	http://asia.ensembl.org/Homo_sapiens/Gene/Idhistory?g=ENSG00000263443
ENSG00000267053.2	lincRNA	chr19:36795482-36803570	+	20.6105	48.8127	1.24388	1.30679e-16	1.85516e-14	None	http://asia.ensembl.org/Homo_sapiens/Gene/Idhistory?g=ENSG00000267053
ENSG00000267469.1	antisense	chr19:3052908-3053722	+	5.60994	20.9188	1.89874	4.64993e-09	2.45308e-07	None	http://asia.ensembl.org/Homo_sapiens/Gene/Idhistory?g=ENSG00000267469
ENSG00000267488.1	antisense	chr17:34510615-34523870	+	5.10534	16.7202	1.71151	1.58697e-11	1.35572e-09	None	http://asia.ensembl.org/Homo_sapiens/Gene/Idhistory?g=ENSG00000267488
ENSG00000267605.1	lincRNA	chr19:37756841-37762420	-	29.8947	74.0244	1.30811	0	0	None	http://asia.ensembl.org/Homo_sapiens/Gene/Idhistory?g=ENSG00000267605
ENSG00000269825.1	sense_intronic	chr19:53153690-53156537	-	6.10738	30.5515	2.32262	0	0	None	http://asia.ensembl.org/Homo_sapiens/Gene/Idhistory?g=ENSG00000269825
ENSG00000269990.1	lincRNA	chr11:66303369-66305407	-	8.58222	19.0256	1.14852	2.0139e-09	1.14021e-07	None	http://asia.ensembl.org/Homo_sapiens/Gene/Idhistory?g=ENSG00000269990
ENSG00000272384.1	lincRNA	chr8:123792210-123793069	-	13.6152	52.9446	1.95926	0	0	None	http://asia.ensembl.org/Homo_sapiens/Gene/Idhistory?g=ENSG00000272384
ENSG00000272502.1	antisense	chr8:121824459-121825599	+	6.32625	28.3233	2.16257	0	0	None	http://asia.ensembl.org/Homo_sapiens/Gene/Idhistory?g=ENSG00000272502
ENSG00000273149.1	antisense	chr13:45914174-45915318	+	42.1937	101.535	1.26687	0	0	None	http://asia.ensembl.org/Homo_sapiens/Gene/Idhistory?g=ENSG00000273149
EPSTI1	protein_coding	chr13:43460524-43566448	-	2.83453	6.69946	1.24093	7.11466e-08	2.87991e-06	epithelial stromal interaction 1	http://www.ncbi.nlm.nih.gov/gene/?term=94240
ESF1	protein_coding	chr20:13694969-13765579	-	5.59622	12.2746	1.13315	5.00089e-12	4.64117e-10	ESF1 nucleolar pre-rRNA processing protein homolog	http://www.ncbi.nlm.nih.gov/gene/?term=51575
ESRRAP1	pseudogene	chr13:20133557-20135638	-	3.03353	7.9828	1.3959	1.02629e-07	3.98303e-06	estrogen-related receptor alpha pseudogene 1	http://www.ncbi.nlm.nih.gov/gene/?term=144847
EXT1	protein_coding	chr8:118811602-119124058	-	10.6529	31.7976	1.57767	1.97341e-12	1.69045e-10	exostosin glycosyltransferase 1	http://www.ncbi.nlm.nih.gov/gene/?term=2131
FAM197Y7P	lncRNA	chrY:9187189-9192791	-	0	6.69895	Inf	0	0	family with sequence similarity 197 Y-linked member 7	http://www.ncbi.nlm.nih.gov/gene/?term=105379269
FAM83A	protein_coding	chr8:124191287-124222319	+	9.61569	37.1177	1.94865	0	0	family with sequence similarity 83 member A	http://www.ncbi.nlm.nih.gov/gene/?term=84985
FAM83A-AS1	lncRNA	chr8:124213412-124214983	-	7.95805	43.779	2.45975	0	0	FAM83A antisense RNA 1	http://www.ncbi.nlm.nih.gov/gene/?term=100131726
FAM90A3P	pseudogene	chr8:7120388-7125620	+	4.40085	12.5799	1.51527	1.85829e-12	1.82096e-10	family with sequence similarity 90 member A3, pseudogene	http://www.ncbi.nlm.nih.gov/gene/?term=389611
FAM91A1	protein_coding	chr8:124780679-124827692	+	4.36141	14.6933	1.75229	7.00368e-16	4.78606e-13	family with sequence similarity 91 member A1	http://www.ncbi.nlm.nih.gov/gene/?term=157769
FBXL19-AS1	lncRNA	chr16:30930640-30934590	-	16.0645	34.6371	1.10844	1.14492e-12	1.38865e-10	FBXL19 antisense RNA 1 (head to head)	http://www.ncbi.nlm.nih.gov/gene/?term=283932
FBXO32	protein_coding	chr8:124510127-124553493	-	7.85103	31.2736	1.99399	2.46817e-14	1.56025e-12	F-box protein 32	http://www.ncbi.nlm.nih.gov/gene/?term=114907
FBXW4	protein_coding	chr10:103370421-103455052	-	15.1607	40.0133	1.40014	3.75848e-14	4.37246e-12	F-box and WD repeat domain containing 4	http://www.ncbi.nlm.nih.gov/gene/?term=6468
FER1L6-AS1	lncRNA	chr8:124996378-125053023	-	9.76627	29.8276	1.61077	6.07416e-13	4.59704e-11	FER1L6 antisense RNA 1	http://www.ncbi.nlm.nih.gov/gene/?term=439941
FFAR1	protein_coding	chr19:35842445-35843367	+	10.5165	24.5043	1.22038	2.07458e-07	7.50663e-06	free fatty acid receptor 1	http://www.ncbi.nlm.nih.gov/gene/?term=2864
FGFR2	protein_coding	chr10:123237844-123357972	-	7.3363	171.717	4.54884	0	0	fibroblast growth factor receptor 2	http://www.ncbi.nlm.nih.gov/gene/?term=2263
FOXA3	protein_coding	chr19:46367518-46377055	+	5.24083	11.9469	1.18877	1.56204e-07	5.79734e-06	forkhead box A3	http://www.ncbi.nlm.nih.gov/gene/?term=3171
FTL	protein_coding	chr19:49468566-49470136	+	127.46	676.549	2.40815	0	0	ferritin light chain	http://www.ncbi.nlm.nih.gov/gene/?term=2512
GAB4	protein_coding	chr22:17442826-17489112	-	8.01107	16.4237	1.03571	4.09132e-09	2.18769e-07	GRB2 associated binding protein family member 4	http://www.ncbi.nlm.nih.gov/gene/?term=128954
GDF11	protein_coding	chr12:56137064-56147154	+	19.6337	46.7805	1.25258	0	0	growth differentiation factor 11	http://www.ncbi.nlm.nih.gov/gene/?term=10220
GDF15	protein_coding	chr19:18496770-18499987	+	11.3326	24.5818	1.11712	3.73954e-10	2.42103e-08	growth differentiation factor 15	http://www.ncbi.nlm.nih.gov/gene/?term=9518
GPC6	protein_coding	chr13:93879061-95060274	+	2.28654	4.85364	1.0859	1.23564e-08	5.93324e-07	glypican 6	http://www.ncbi.nlm.nih.gov/gene/?term=10082
GPR42	pseudogene	chr19:35862248-35863502	+	1.36387	9.72617	2.83417	1.21611e-10	8.55066e-09	G protein-coupled receptor 42 (gene/pseudogene)	http://www.ncbi.nlm.nih.gov/gene/?term=2866
GSC	protein_coding	chr14:95234560-95236499	-	8.14592	19.4199	1.25339	1.19225e-07	4.55771e-06	goosecoid homeobox	http://www.ncbi.nlm.nih.gov/gene/?term=145258
GSTM1	protein_coding	chr1:110230418-110236367	+	0.237285	7.48217	4.97877	4.48974e-13	4.70847e-11	glutathione S-transferase mu 1	http://www.ncbi.nlm.nih.gov/gene/?term=2944
GSTT1	protein_coding	chr22:24376133-24384311	-	0.692987	9.63378	3.7972	1.2057e-13	1.3564e-11	glutathione S-transferase theta 1	http://www.ncbi.nlm.nih.gov/gene/?term=2952
GSTT2B	protein_coding	chr22:24299601-24303368	-	0.132313	4.19773	4.98758	9.7584e-08	3.80428e-06	glutathione S-transferase theta 2B (gene/pseudogene)	http://www.ncbi.nlm.nih.gov/gene/?term=653689
GUCY2D	protein_coding	chr17:7905988-7923658	+	6.03304	13.0764	1.11601	4.53424e-11	3.47588e-09	guanylate cyclase 2D, retinal	http://www.ncbi.nlm.nih.gov/gene/?term=3000
H1F0	protein_coding	chr22:38201114-38203443	+	12.4586	29.2868	1.2331	3.57584e-12	1.99299e-10	H1 histone family member 0	http://www.ncbi.nlm.nih.gov/gene/?term=3005
HAS2	protein_coding	chr8:122625271-122653630	-	4.18027	15.1666	1.85923	0	0	hyaluronan synthase 2	http://www.ncbi.nlm.nih.gov/gene/?term=3037
HAS2-AS1	antisense_RNA	chr8:122651586-122657565	+	4.29256	19.3851	2.17504	0	0	HAS2 antisense RNA 1	http://www.ncbi.nlm.nih.gov/gene/?term=594842
HIC1	protein_coding	chr17:1958393-1962981	+	4.82669	10.7546	1.15584	4.24835e-08	1.81464e-06	HIC ZBTB transcriptional repressor 1	http://www.ncbi.nlm.nih.gov/gene/?term=3090
HIST1H3B	protein_coding	chr6:26031817-26032288	-	42.6722	91.1603	1.09511	1.77636e-15	2.46595e-13	histone cluster 1 H3 family member b	http://www.ncbi.nlm.nih.gov/gene/?term=8358
HIST1H4B	protein_coding	chr6:26027124-26027480	-	35.919	91.2562	1.34517	3.78586e-13	4.04872e-11	histone cluster 1 H4 family member b	http://www.ncbi.nlm.nih.gov/gene/?term=8366
HLA-DQA1	protein_coding	chr6:32605183-32611429	+	0	5.54929	Inf	7.84972e-12	7.08306e-10	major histocompatibility complex, class II, DQ alpha 1	http://www.ncbi.nlm.nih.gov/gene/?term=3117
HLA-DQB1-AS1	lncRNA	chr6:32627657-32628506	+	0	8.84573	Inf	9.7584e-08	3.80428e-06	HLA-DQB1 antisense RNA 1	http://www.ncbi.nlm.nih.gov/gene/?term=106480429
HMGN5	protein_coding	chrX:80369200-80457441	-	2.46253	12.5928	2.35439	3.08642e-14	3.75503e-12	high mobility group nucleosome binding domain 5	http://www.ncbi.nlm.nih.gov/gene/?term=79366
HNF4GP1	pseudogene	chr13:56570623-56574584	-	0.972844	3.43084	1.81828	1.47318e-08	6.90547e-07	hepatocyte nuclear factor 4 gamma pseudogene 1	http://www.ncbi.nlm.nih.gov/gene/?term=100130462
HNRNPH3	protein_coding	chr10:70091450-70102953	+	13.6035	36.6064	1.42812	0	0	heterogeneous nuclear ribonucleoprotein H3	http://www.ncbi.nlm.nih.gov/gene/?term=3189
HNRNPM	protein_coding	chr19:8509712-8554002	+	15.9802	42.9526	1.42646	0	0	heterogeneous nuclear ribonucleoprotein M	http://www.ncbi.nlm.nih.gov/gene/?term=4670
HPN	protein_coding	chr19:35531410-35557477	+	7.22787	16.3721	1.17959	3.65417e-11	2.8934e-09	hepsin	http://www.ncbi.nlm.nih.gov/gene/?term=3249
HSD3B7	protein_coding	chr16:30996519-31000473	+	9.29098	23.2505	1.32336	1.66189e-12	1.35111e-10	hydroxy-delta-5-steroid dehydrogenase, 3 beta- and steroid delta-isomerase 7	http://www.ncbi.nlm.nih.gov/gene/?term=80270
HSP90AA1	protein_coding	chr14:102547075-102606086	-	29.1896	61.95	1.08565	2.22045e-16	3.60195e-14	heat shock protein 90 alpha family class A member 1	http://www.ncbi.nlm.nih.gov/gene/?term=3320
IGHEP1	C_region_pseudogene	chr14:106188131-106188864	-	5.90739	24.5147	2.05306	2.17975e-10	1.47745e-08	immunoglobulin heavy constant epsilon P1 (pseudogene)	http://www.ncbi.nlm.nih.gov/gene/?term=3498
IMPDH1P6	pseudogene	chr8:124412762-124415055	+	10.4345	50.4743	2.27418	0	0	inosine monophosphate dehydrogenase 1 pseudogene 6	http://www.ncbi.nlm.nih.gov/gene/?term=392267
ISG15	protein_coding	chr1:948847-949920	+	22.4145	72.4744	1.69304	0	0	ISG15 ubiquitin-like modifier	http://www.ncbi.nlm.nih.gov/gene/?term=9636
KBTBD7	protein_coding	chr13:41765527-41768711	-	3.98164	9.43701	1.24497	3.90882e-09	2.09528e-07	kelch repeat and BTB domain containing 7	http://www.ncbi.nlm.nih.gov/gene/?term=84078
KIF1C	protein_coding	chr17:4901243-4931694	+	61.9136	370.104	2.5796	2.22045e-16	3.60195e-14	kinesin family member 1C	http://www.ncbi.nlm.nih.gov/gene/?term=10749
KLF5	protein_coding	chr13:73629114-73651680	+	4.42974	9.13032	1.04344	2.59534e-09	1.44299e-07	Kruppel like factor 5	http://www.ncbi.nlm.nih.gov/gene/?term=688
KLHL38	protein_coding	chr8:124657915-124665190	-	12.0226	51.5715	2.10083	0	0	kelch like family member 38	http://www.ncbi.nlm.nih.gov/gene/?term=340359
KRT19	protein_coding	chr17:39679869-39684641	-	19.1095	42.3918	1.1495	0	0	keratin 19	http://www.ncbi.nlm.nih.gov/gene/?term=3880
LCE3C	protein_coding	chr1:152573138-152573562	+	0.118435	19.1138	7.33437	2.04148e-12	1.98698e-10	late cornified envelope 3C	http://www.ncbi.nlm.nih.gov/gene/?term=353144
LINC00665	lncRNA	chr19:36803963-36822620	-	8.05451	17.2424	1.09809	1.46888e-09	8.53961e-08	long intergenic non-protein coding RNA 665	http://www.ncbi.nlm.nih.gov/gene/?term=100506930
LINC00824	lncRNA	chr8:129417515-129576925	-	11.2504	30.2629	1.42758	0	0	long intergenic non-protein coding RNA 824	http://www.ncbi.nlm.nih.gov/gene/?term=101927774
LINC01002	lncRNA	chr19:197016-202209	-	1.95419	5.25959	1.42838	1.52992e-09	8.83516e-08	long intergenic non-protein coding RNA 1002	http://www.ncbi.nlm.nih.gov/gene/?term=399844
LINC01151	lncRNA	chr8:123682624-123706345	-	2.20142	17.2797	2.97258	9.02738e-11	6.47341e-09	long intergenic non-protein coding RNA 1151	http://www.ncbi.nlm.nih.gov/gene/?term=104266958
LINC01396	lncRNA	chr4:4846164-4852554	+	0.637095	11.3732	4.15799	1.00387e-07	3.90654e-06	long intergenic non-protein coding RNA 1396	http://www.ncbi.nlm.nih.gov/gene/?term=103695434
LINC01510	lncRNA	chr7:116203648-116254874	-	4.48645	14.6303	1.70531	1.69292e-07	6.23501e-06	long intergenic non-protein coding RNA 1510	http://www.ncbi.nlm.nih.gov/gene/?term=100996266
LINC01529	lncRNA	chr19:36279778-36288811	-	9.6659	21.6461	1.16313	2.48468e-13	2.73138e-11	long intergenic non-protein coding RNA 1529	http://www.ncbi.nlm.nih.gov/gene/?term=644050
LOC100286746	pseudogene	chr8:119994249-119995180	-	3.42819	11.9803	1.80515	1.55027e-07	5.75861e-06	GABA type A receptor associated protein like 2 pseudogene	http://www.ncbi.nlm.nih.gov/gene/?term=100286746
LOC100418716	pseudogene	chr7:116513515-116514861	-	8.06847	24.4663	1.60043	4.25161e-09	2.25946e-07	KIAA1468 pseudogene	http://www.ncbi.nlm.nih.gov/gene/?term=100418716
LOC100420109	pseudogene	chr2:87156839-87158032	-	3.31279	18.2516	2.4619	3.10862e-15	4.23399e-13	WW domain binding protein 1 pseudogene	http://www.ncbi.nlm.nih.gov/gene/?term=100420109
LOC101927513	lncRNA	chr8:120075181-120081021	-	3.85713	12.1832	1.65929	3.62482e-10	2.3538e-08	uncharacterized LOC101927513	http://www.ncbi.nlm.nih.gov/gene/?term=101927513
LOC101927543	lncRNA	chr8:121773493-121789072	+	5.78116	18.4447	1.67378	0	0	uncharacterized LOC101927543	http://www.ncbi.nlm.nih.gov/gene/?term=101927543
LOC101929372	protein_coding	chr22:18062923-18071958	-	7.00207	15.2555	1.12348	1.91592e-07	6.97918e-06	uncharacterized LOC101929372	http://www.ncbi.nlm.nih.gov/gene/?term=101929372
LOC102724009	lncRNA	chr17:4922509-4923388	-	19.2537	89.2227	2.21227	0	0	uncharacterized LOC102724009	http://www.ncbi.nlm.nih.gov/gene/?term=102724009
LOC105375734	lncRNA	chr8:123426566-123580883	-	5.64981	22.9452	2.02192	7.49741e-10	4.54165e-08	None	http://www.ncbi.nlm.nih.gov/gene/?term=LOC105375734
LOC284023	lncRNA	chr17:7816640-7819265	-	3.97716	10.0398	1.33592	1.39925e-09	8.15669e-08	uncharacterized LOC284023	http://www.ncbi.nlm.nih.gov/gene/?term=284023
LOC284412	lncRNA	chr19:37756841-37759912	-	28.0707	64.4775	1.19973	0	0	uncharacterized LOC284412	http://www.ncbi.nlm.nih.gov/gene/?term=284412
LOC390705	misc_RNA	chr16:32300868-32301302	-	26.5199	65.3609	1.30135	8.00584e-11	5.83752e-09	protein phosphatase 2 regulatory subunit B'', beta pseudogene	http://www.ncbi.nlm.nih.gov/gene/?term=390705
LOC392264	pseudogene	chr8:120492318-120493708	-	6.90573	27.1995	1.97771	0	0	zinc finger protein 532 pseudogene	http://www.ncbi.nlm.nih.gov/gene/?term=392264
LOC392266	pseudogene	chr8:124300572-124303720	+	5.36552	21.8964	2.02891	0	0	17beta-hydroxysteroid dehydrogenase pseudogene	http://www.ncbi.nlm.nih.gov/gene/?term=392266
LRFN3	protein_coding	chr19:36428022-36436097	+	9.07336	19.2315	1.08376	6.75904e-13	6.97018e-11	leucine rich repeat and fibronectin type III domain containing 3	http://www.ncbi.nlm.nih.gov/gene/?term=79414
LRRC37A2	protein_coding	chr17:44590076-44633014	+	2.84329	10.9129	1.9404	2.22045e-16	3.60195e-14	leucine rich repeat containing 37 member A2	http://www.ncbi.nlm.nih.gov/gene/?term=474170
LRRC42	protein_coding	chr1:54411999-54433841	+	10.563	26.6131	1.33312	0	0	leucine rich repeat containing 42	http://www.ncbi.nlm.nih.gov/gene/?term=115353
LRRC4B	protein_coding	chr19:51020149-51071302	-	5.73669	12.7405	1.15113	1.08714e-10	7.7064e-09	leucine rich repeat containing 4B	http://www.ncbi.nlm.nih.gov/gene/?term=94030
LSR	protein_coding	chr19:35739559-35758867	+	11.0245	26.1147	1.24415	4.25103e-11	4.0002e-10	lipolysis stimulated lipoprotein receptor	http://www.ncbi.nlm.nih.gov/gene/?term=51599
LYZ	protein_coding	chr12:69742134-69748013	+	5.22401	18.33	1.81098	5.10703e-15	6.82702e-13	lysozyme	http://www.ncbi.nlm.nih.gov/gene/?term=4069
MAFK	protein_coding	chr7:1570368-1582679	+	17.2143	36.5043	1.08446	0	0	MAF bZIP transcription factor K	http://www.ncbi.nlm.nih.gov/gene/?term=7975
MAL2	protein_coding	chr8:120220610-120257913	+	4.2738	18.4652	2.11122	0	0	mal, T-cell differentiation protein 2 (gene/pseudogene)	http://www.ncbi.nlm.nih.gov/gene/?term=114569
MAP4K4	protein_coding	chr2:102314165-102511152	+	11.0006	35.5101	1.69064	0	0	mitogen-activated protein kinase kinase kinase kinase 4	http://www.ncbi.nlm.nih.gov/gene/?term=9448
MED30	protein_coding	chr8:118532952-118552501	+	3.75935	24.2803	2.69123	4.44089e-16	6.82071e-14	mediator complex subunit 30	http://www.ncbi.nlm.nih.gov/gene/?term=90390
MET	protein_coding	chr7:116312413-116438440	+	8.84962	20.5598	1.21614	8.83399e-12	7.01168e-10	MET proto-oncogene, receptor tyrosine kinase	http://www.ncbi.nlm.nih.gov/gene/?term=4233
MRPL13	protein_coding	chr8:121408083-121457647	-	5.79606	17.7728	1.61653	1.83891e-09	1.04798e-07	mitochondrial ribosomal protein L13	http://www.ncbi.nlm.nih.gov/gene/?term=28998
MTBP	protein_coding	chr8:121457638-121535875	+	3.39049	7.86814	1.21453	2.97362e-08	1.31021e-06	MDM2 binding protein	http://www.ncbi.nlm.nih.gov/gene/?term=27085
MYEOV	protein_coding	chr11:69061605-69064754	+	10.7572	23.3277	1.11674	6.5925e-13	6.81467e-11	myeloma overexpressed	http://www.ncbi.nlm.nih.gov/gene/?term=26579
MZT2B	protein_coding	chr2:130939495-130948302	+	10.6674	22.7579	1.09316	7.62726e-08	3.06733e-06	mitotic spindle organizing protein 2B	http://www.ncbi.nlm.nih.gov/gene/?term=80097
N4BP2L2-IT2	lncRNA	chr13:33078643-33083532	-	2.46426	5.13947	1.06047	8.35587e-08	3.32944e-06	N4BPL2 intronic transcript 2	http://www.ncbi.nlm.nih.gov/gene/?term=116828
NANOS2	protein_coding	chr19:46416472-46418036	-	7.89937	17.1465	1.11811	1.0123e-07	3.93228e-06	nanos C2HC-type zinc finger 2	http://www.ncbi.nlm.nih.gov/gene/?term=339345
NCAPGP1	pseudogene	chr8:121647724-121650400	-	2.4461	12.2968	2.32974	2.22045e-16	3.60195e-14	non-SMC condensin I complex subunit G pseudogene 1	http://www.ncbi.nlm.nih.gov/gene/?term=100421096
NET1	protein_coding	chr10:5454514-5501019	+	58.6223	271.203	2.20985	0	0	neuroepithelial cell transforming 1	http://www.ncbi.nlm.nih.gov/gene/?term=10276
NOV	protein_coding	chr8:120428552-120436678	+	6.30122	21.9939	1.8034	0	0	nephroblastoma overexpressed	http://www.ncbi.nlm.nih.gov/gene/?term=4856
NR2F6	protein_coding	chr19:17342694-17356151	-	11.3363	22.8354	1.01032	4.054e-11	3.15804e-09	nuclear receptor subfamily 2 group F member 6	http://www.ncbi.nlm.nih.gov/gene/?term=2063
NSRP1	protein_coding	chr17:28443825-28513493	+	8.98812	24.7117	1.4591	0	0	nuclear speckle splicing regulatory protein 1	http://www.ncbi.nlm.nih.gov/gene/?term=84081
OR4A45P	pseudogene	chr11:48600935-48602000	+	0	4.32712	Inf	9.7584e-08	3.80428e-06	olfactory receptor family 4 subfamily A member 45 pseudogene	http://www.ncbi.nlm.nih.gov/gene/?term=403251
PCDH9	protein_coding	chr13:66876966-67804468	-	2.42684	5.60634	1.20798	9.16933e-12	8.1885e-10	protocadherin 9	http://www.ncbi.nlm.nih.gov/gene/?term=5101
PGPEP1	protein_coding	chr19:18451397-18480763	+	7.99362	19.6852	1.30019	5.82125e-14	4.26555e-11	pyroglutamyl-peptidase I	http://www.ncbi.nlm.nih.gov/gene/?term=54858
PINK1	protein_coding	chr1:20959948-20978004	+	15.2882	46.3134	1.59901	0	0	PTEN induced putative kinase 1	http://www.ncbi.nlm.nih.gov/gene/?term=65018
PKD1P2	pseudogene	chr16:16450274-16471364	+	2.24744	8.48648	1.91688	1.65212e-13	1.54902e-11	polycystin 1, transient receptor potential channel interacting pseudogene 2	http://www.ncbi.nlm.nih.gov/gene/?term=283955
PKD1P5	pseudogene	chr16:18468378-18495871	-	2.70871	6.07726	1.16582	5.77471e-12	5.31028e-10	polycystin 1, transient receptor potential channel interacting pseudogene 5	http://www.ncbi.nlm.nih.gov/gene/?term=348156
PLEKHA4	protein_coding	chr19:49340354-49371884	-	12.5403	38.2448	1.60869	0	0	pleckstrin homology domain containing A4	http://www.ncbi.nlm.nih.gov/gene/?term=57664
PLEKHF1	protein_coding	chr19:30156327-30166384	+	7.97434	22.6822	1.50812	2.22045e-16	3.60195e-14	pleckstrin homology and FYVE domain containing 1	http://www.ncbi.nlm.nih.gov/gene/?term=79156
POM121L4P	misc_RNA	chr22:21043843-21046009	+	7.35608	16.9466	1.20399	1.58725e-09	9.14189e-08	POM121 transmembrane nucleoporin like 4, pseudogene	http://www.ncbi.nlm.nih.gov/gene/?term=266697
PPP1R3C	protein_coding	chr10:93388198-93392858	-	8.30523	17.8364	1.10273	6.59116e-09	3.37044e-07	protein phosphatase 1 regulatory subunit 3C	http://www.ncbi.nlm.nih.gov/gene/?term=5507
PRODH2	protein_coding	chr19:36290892-36304201	-	11.1058	22.3264	1.00743	6.67326e-09	3.4084e-07	proline dehydrogenase 2	http://www.ncbi.nlm.nih.gov/gene/?term=58510
PRSS53	protein_coding	chr16:31094745-31100130	-	11.1194	23.7926	1.09744	4.57856e-12	4.27511e-10	protease, serine 53	http://www.ncbi.nlm.nih.gov/gene/?term=339105
PYCARD-AS1	lncRNA	chr16:31213206-31214773	+	10.1593	22.0647	1.11894	1.72004e-07	6.32414e-06	PYCARD antisense RNA 1	http://www.ncbi.nlm.nih.gov/gene/?term=100652740
RAB13	protein_coding	chr1:153954093-153958853	-	247.939	1263.79	2.3497	4.44089e-16	6.82071e-14	RAB13, member RAS oncogene family	http://www.ncbi.nlm.nih.gov/gene/?term=5872
RABAC1	protein_coding	chr19:42460833-42463528	-	16.4259	36.2037	1.14017	3.94506e-08	1.69849e-06	Rab acceptor 1	http://www.ncbi.nlm.nih.gov/gene/?term=10567
RAD21	protein_coding	chr8:117858173-117887105	-	4.47995	9.01894	1.00948	1.17384e-10	8.28036e-09	RAD21 cohesin complex component	http://www.ncbi.nlm.nih.gov/gene/?term=5885
RASSF3	protein_coding	chr12:65004293-65091347	+	30.0598	105.842	1.816	2.22045e-16	3.60195e-14	Ras association domain family member 3	http://www.ncbi.nlm.nih.gov/gene/?term=283349
RBM25	protein_coding	chr14:73525221-73588076	+	11.63	30.9901	1.41396	0	0	RNA binding motif protein 25	http://www.ncbi.nlm.nih.gov/gene/?term=58517
REXO1L2P	misc_RNA	chr8:86787245-86788322	-	59.4595	122.749	1.04573	0	0	REXO1 like 2, pseudogene	http://www.ncbi.nlm.nih.gov/gene/?term=100288527
RFPL2	protein_coding	chr22:32586422-32600718	-	6.24055	13.4793	1.111	3.68973e-09	1.98768e-07	ret finger protein like 2	http://www.ncbi.nlm.nih.gov/gene/?term=10739
RN7SKP226	pseudogene	chr8:129232750-129232998	+	11.0629	45.4184	2.03755	2.21729e-08	1.00267e-06	RNA, 7SK small nuclear pseudogene 226	http://www.ncbi.nlm.nih.gov/gene/?term=106480903
RNF222	protein_coding	chr17:8294022-8301144	-	5.88378	12.1803	1.04974	2.7274e-07	9.47306e-06	ring finger protein 222	http://www.ncbi.nlm.nih.gov/gene/?term=643904
RPL13AP5	misc_RNA	chr10:98510023-98510680	+	3.03226	13.1361	2.11508	3.96708e-08	1.70628e-06	ribosomal protein L13a pseudogene 5	http://www.ncbi.nlm.nih.gov/gene/?term=728658
RPL18AP11	pseudogene	chr9:8713276-8713894	+	3.7767	16.1771	2.09876	1.31445e-07	4.96351e-06	ribosomal protein L18a pseudogene 11	http://www.ncbi.nlm.nih.gov/gene/?term=100127999
RPL21P16	pseudogene	chr10:122114157-122114738	-	0	22.1361	Inf	4.44089e-16	6.82071e-14	ribosomal protein L21 pseudogene 16	http://www.ncbi.nlm.nih.gov/gene/?term=729402
RPL7AP66	pseudogene	chr18:36914781-36915656	-	1.34133	9.13709	2.76807	5.11412e-08	2.13806e-06	ribosomal protein L7a pseudogene 66	http://www.ncbi.nlm.nih.gov/gene/?term=388474
RPS11	protein_coding	chr19:49999622-50002969	+	68.6942	156.583	1.18867	0	0	ribosomal protein S11	http://www.ncbi.nlm.nih.gov/gene/?term=6205
RPS15AP5	pseudogene	chr10:123473091-123473551	+	3.82417	70.8302	4.21114	4.44089e-16	6.82071e-14	ribosomal protein S15a pseudogene 5	http://www.ncbi.nlm.nih.gov/gene/?term=414230
RPS19	protein_coding	chr19:42363988-42375484	+	52.9083	133.426	1.33447	0	0	ribosomal protein S19	http://www.ncbi.nlm.nih.gov/gene/?term=6223
RPS26P35	pseudogene	chr8:119774013-119774471	-	4.78681	27.6289	2.52904	5.23555e-11	3.95745e-09	ribosomal protein S26 pseudogene 35	http://www.ncbi.nlm.nih.gov/gene/?term=441377
RRP7BP	misc_RNA	chr22:42969250-42978017	-	5.46424	12.3376	1.17497	5.30485e-08	2.20927e-06	ribosomal RNA processing 7 homolog B, pseudogene	http://www.ncbi.nlm.nih.gov/gene/?term=91695
S100A10	protein_coding	chr1:151955386-151966714	-	16.8651	75.6652	2.16559	0	0	S100 calcium binding protein A10	http://www.ncbi.nlm.nih.gov/gene/?term=6281
S100A11	protein_coding	chr1:152004982-152009511	-	17.8892	71.7526	2.00394	2.22045e-16	3.60195e-14	S100 calcium binding protein A11	http://www.ncbi.nlm.nih.gov/gene/?term=6282
S100A6	protein_coding	chr1:153507076-153508717	-	28.3843	102.332	1.85009	0	0	S100 calcium binding protein A6	http://www.ncbi.nlm.nih.gov/gene/?term=6277
SAMD12	protein_coding	chr8:119201694-119634234	-	5.41653	15.2848	1.49666	2.75115e-13	3.41264e-11	sterile alpha motif domain containing 12	http://www.ncbi.nlm.nih.gov/gene/?term=401474
SAMD12-AS1	lncRNA	chr8:119633240-119738306	+	5.61248	22.0599	1.97472	1.34819e-10	9.40303e-09	SAMD12 antisense RNA 1	http://www.ncbi.nlm.nih.gov/gene/?term=552860
SAMD4A	protein_coding	chr14:55034330-55260033	+	15.3916	44.7166	1.53867	2.22045e-16	3.60195e-14	sterile alpha motif domain containing 4A	http://www.ncbi.nlm.nih.gov/gene/?term=23034
SBSN	protein_coding	chr19:36014269-36019253	-	6.67745	16.8221	1.33299	1.11227e-11	9.7717e-10	suprabasin	http://www.ncbi.nlm.nih.gov/gene/?term=374897
SDHAF3	protein_coding	chr7:96745905-96811075	+	5.33376	13.1991	1.30722	4.49213e-08	1.91123e-06	succinate dehydrogenase complex assembly factor 3	http://www.ncbi.nlm.nih.gov/gene/?term=57001
SEPT14P16	pseudogene	chr16:90244123-90246704	+	0.0731337	3.12292	5.41621	5.91907e-11	4.44309e-09	septin 14 pseudogene 16	http://www.ncbi.nlm.nih.gov/gene/?term=107126283
SERPINA1	protein_coding	chr14:94843084-94857029	-	7.6033	15.3133	1.01009	1.24345e-13	1.39524e-11	serpin family A member 1	http://www.ncbi.nlm.nih.gov/gene/?term=5265
SH3PXD2A	protein_coding	chr10:105353784-105615164	-	12.6039	31.8893	1.3392	2.22045e-16	3.60195e-14	SH3 and PX domains 2A	http://www.ncbi.nlm.nih.gov/gene/?term=9644
SHISA3	protein_coding	chr4:42399856-42404504	+	2.75825	7.89015	1.5163	2.24357e-07	8.0375e-06	shisa family member 3	http://www.ncbi.nlm.nih.gov/gene/?term=152573
SIGLEC14	protein_coding	chr19:52145806-52150132	-	0.163792	3.82673	4.54618	5.67324e-09	2.93571e-07	sialic acid binding Ig like lectin 14	http://www.ncbi.nlm.nih.gov/gene/?term=100049587
SLC30A8	protein_coding	chr8:117962512-118188953	+	6.51256	13.0757	1.00559	1.94574e-11	7.77422e-10	solute carrier family 30 member 8	http://www.ncbi.nlm.nih.gov/gene/?term=169026
SLC34A2	protein_coding	chr4:25657435-25680370	+	4.61578	9.39145	1.02477	2.72636e-09	1.51003e-07	solute carrier family 34 member 2	http://www.ncbi.nlm.nih.gov/gene/?term=10568
SLC7A10	protein_coding	chr19:33699570-33716756	-	8.50029	18.0491	1.08634	1.92674e-09	1.09516e-07	solute carrier family 7 member 10	http://www.ncbi.nlm.nih.gov/gene/?term=56301
SNORD32A	snoRNA	chr19:49993223-49993304	+	158.673	385.546	1.28084	4.35207e-14	5.17849e-12	small nucleolar RNA, C/D box 32A	http://www.ncbi.nlm.nih.gov/gene/?term=26819
SNTB1	protein_coding	chr8:121547985-121824309	-	4.67521	16.672	1.83433	0	0	syntrophin beta 1	http://www.ncbi.nlm.nih.gov/gene/?term=6641
SNX18P22	pseudogene	chr1:143430740-143431694	+	4.62957	20.7494	2.16412	8.76432e-12	7.8644e-10	sorting nexin 18 pseudogene 22	http://www.ncbi.nlm.nih.gov/gene/?term=100419027
SNX18P25	pseudogene	chr4:49590791-49591745	+	2.32663	15.0089	2.6895	1.85175e-10	1.26903e-08	sorting nexin 18 pseudogene 25	http://www.ncbi.nlm.nih.gov/gene/?term=100419005
SNX8	protein_coding	chr7:2291405-2354110	-	31.624	63.5639	1.00719	0	0	sorting nexin 8	http://www.ncbi.nlm.nih.gov/gene/?term=29886
SPACA6	protein_coding	chr19:52192687-52208443	+	6.43454	17.6718	1.45754	1.57652e-14	1.97919e-12	sperm acrosome associated 6	http://www.ncbi.nlm.nih.gov/gene/?term=147650
SPINT2	protein_coding	chr19:38755098-38783254	+	6.4636	19.3524	1.5821	1.55431e-15	2.17865e-13	serine peptidase inhibitor, Kunitz type 2	http://www.ncbi.nlm.nih.gov/gene/?term=10653
ST7	protein_coding	chr7:116593381-116870077	+	13.1502	37.1807	1.49947	0	0	suppression of tumorigenicity 7	http://www.ncbi.nlm.nih.gov/gene/?term=7982
ST7-AS1	lncRNA	chr7:116592500-116594388	-	15.6354	39.208	1.32633	1.91624e-13	2.11726e-11	ST7 antisense RNA 1	http://www.ncbi.nlm.nih.gov/gene/?term=93653
ST7-OT3	lncRNA	chr7:116822735-116849991	+	8.12367	30.3891	1.90335	2.10676e-12	2.04592e-10	ST7 overlapping transcript 3	http://www.ncbi.nlm.nih.gov/gene/?term=93655
STRCP1	pseudogene	chr15:43991577-44010460	-	0.726272	2.96674	2.0303	9.0963e-10	5.43419e-08	stereocilin pseudogene 1	http://www.ncbi.nlm.nih.gov/gene/?term=554225
SYNJ2BP	protein_coding	chr14:70833213-70883807	-	6.8578	13.9213	1.02148	1.39216e-13	4.66943e-11	synaptojanin 2 binding protein	http://www.ncbi.nlm.nih.gov/gene/?term=55333
SYNJ2BP-COX16	protein_coding	chr14:70791798-70883807	-	3.67229	11.6533	1.66598	3.70974e-11	2.93205e-09	SYNJ2BP-COX16 readthrough	http://www.ncbi.nlm.nih.gov/gene/?term=100529257
TAF15	protein_coding	chr17:34136459-34174246	+	25.873	94.3793	1.86702	0	0	TATA-box binding protein associated factor 15	http://www.ncbi.nlm.nih.gov/gene/?term=8148
TAF2	protein_coding	chr8:120743014-120845074	-	4.92011	13.5626	1.46287	2.99568e-12	1.86299e-10	TATA-box binding protein associated factor 2	http://www.ncbi.nlm.nih.gov/gene/?term=6873
TAX1BP3	protein_coding	chr17:3566187-3571973	-	9.24699	21.9071	1.24434	5.5377e-11	4.17855e-09	Tax1 binding protein 3	http://www.ncbi.nlm.nih.gov/gene/?term=30851
TBC1D31	protein_coding	chr8:124084859-124164393	+	5.7172	14.2363	1.31619	4.49501e-14	2.73607e-11	TBC1 domain family member 31	http://www.ncbi.nlm.nih.gov/gene/?term=93594
TBC1D3C	protein_coding	chr17:34581085-34592022	-	1.20803	5.66667	2.22984	2.1534e-09	1.21443e-07	TBC1 domain family member 3C	http://www.ncbi.nlm.nih.gov/gene/?term=414060
TECR	protein_coding	chr19:14640372-14676792	+	8.34905	22.8697	1.45375	4.21885e-14	5.03379e-12	trans-2,3-enoyl-CoA reductase	http://www.ncbi.nlm.nih.gov/gene/?term=9524
TMEM161A	protein_coding	chr19:19230425-19249310	-	8.21863	16.5329	1.00837	1.05951e-07	4.09363e-06	transmembrane protein 161A	http://www.ncbi.nlm.nih.gov/gene/?term=54929
TMEM191A	misc_RNA	chr22:21055402-21058891	+	7.58348	15.497	1.03106	1.23709e-07	4.70833e-06	transmembrane protein 191A (pseudogene)	http://www.ncbi.nlm.nih.gov/gene/?term=84222
TMEM219	protein_coding	chr16:29973351-29984373	+	5.63846	16.9016	1.58379	7.17954e-09	3.62847e-07	transmembrane protein 219	http://www.ncbi.nlm.nih.gov/gene/?term=124446
TMSB10	protein_coding	chr2:85132763-85133799	+	104.164	237.199	1.18724	0	0	thymosin beta 10	http://www.ncbi.nlm.nih.gov/gene/?term=9168
TMSB4X	protein_coding	chrX:12993226-12995346	+	43.6573	104.955	1.26548	0	0	thymosin beta 4, X-linked	http://www.ncbi.nlm.nih.gov/gene/?term=7114
TNFRSF11B	protein_coding	chr8:119935796-119964383	-	6.24475	15.057	1.26971	3.59135e-12	3.38886e-10	TNF receptor superfamily member 11b	http://www.ncbi.nlm.nih.gov/gene/?term=4982
TNIP2	protein_coding	chr4:2743387-2758103	-	10.1203	20.3882	1.01049	1.48048e-09	8.58399e-08	TNFAIP3 interacting protein 2	http://www.ncbi.nlm.nih.gov/gene/?term=79155
TNK1	protein_coding	chr17:7284293-7293093	+	8.87734	18.2114	1.03665	2.00833e-10	1.36768e-08	tyrosine kinase non receptor 1	http://www.ncbi.nlm.nih.gov/gene/?term=8711
TP53INP2	protein_coding	chr20:33292112-33301243	+	21.8886	53.0218	1.27641	0	0	tumor protein p53 inducible nuclear protein 2	http://www.ncbi.nlm.nih.gov/gene/?term=58476
TPM4	protein_coding	chr19:16178317-16213813	+	20.3504	47.3085	1.21704	0	0	tropomyosin 4	http://www.ncbi.nlm.nih.gov/gene/?term=7171
TRAK2	protein_coding	chr2:202241930-202316319	-	47.4883	237.543	2.32254	4.44089e-16	6.82071e-14	trafficking kinesin protein 2	http://www.ncbi.nlm.nih.gov/gene/?term=66008
TRPS1	protein_coding	chr8:116420724-116681255	-	4.69156	13.1052	1.482	5.534e-14	6.35488e-11	transcriptional repressor GATA binding 1	http://www.ncbi.nlm.nih.gov/gene/?term=7227
TSHZ3	protein_coding	chr19:31640776-31840431	-	5.89495	11.8453	1.00676	6.02489e-14	9.8151e-11	teashirt zinc finger homeobox 3	http://www.ncbi.nlm.nih.gov/gene/?term=57616
UACA	protein_coding	chr15:70946893-71055850	-	9.27656	21.9892	1.24514	2.22779e-13	1.26698e-10	uveal autoantigen with coiled-coil domains and ankyrin repeats	http://www.ncbi.nlm.nih.gov/gene/?term=55075
USF2	protein_coding	chr19:35759881-35770724	+	9.39503	20.8403	1.1494	4.42224e-11	3.40206e-09	upstream transcription factor 2, c-fos interacting	http://www.ncbi.nlm.nih.gov/gene/?term=7392
UTP23	protein_coding	chr8:117778742-117786923	+	2.99255	7.49788	1.32511	1.88382e-10	1.28898e-08	UTP23, small subunit processome component	http://www.ncbi.nlm.nih.gov/gene/?term=84294
WASHC1	protein_coding	chr9:14511-29739	-	3.55274	10.5673	1.57261	9.33262e-09	4.61959e-07	WASH complex subunit 1	http://www.ncbi.nlm.nih.gov/gene/?term=100287171
WDYHV1	protein_coding	chr8:124428965-124460331	+	4.26999	22.3485	2.38787	0	0	WDYHV motif containing 1	http://www.ncbi.nlm.nih.gov/gene/?term=55093
WNT2	protein_coding	chr7:116916685-116963343	-	14.0159	41.4885	1.56564	0	0	Wnt family member 2	http://www.ncbi.nlm.nih.gov/gene/?term=7472
YDJC	protein_coding	chr22:21982378-21984340	-	6.45298	19.7744	1.6156	1.68681e-11	1.42693e-09	YdjC chitooligosaccharide deacetylase homolog	http://www.ncbi.nlm.nih.gov/gene/?term=150223
YIF1B	protein_coding	chr19:38794200-38806606	-	13.6412	31.1054	1.1892	3.73716e-12	2.26399e-10	Yip1 interacting factor homolog B, membrane trafficking protein	http://www.ncbi.nlm.nih.gov/gene/?term=90522
ZC3H13	protein_coding	chr13:46528600-46626913	-	5.13675	16.9265	1.72035	4.88791e-13	2.42618e-11	zinc finger CCCH-type containing 13	http://www.ncbi.nlm.nih.gov/gene/?term=23091
ZHX1	protein_coding	chr8:124260690-124287781	-	5.30631	16.7691	1.66002	5.04676e-11	2.51108e-09	zinc fingers and homeoboxes 1	http://www.ncbi.nlm.nih.gov/gene/?term=11244
ZHX1-C8orf76	protein_coding	chr8:124238429-124286727	-	7.80663	33.3572	2.09523	7.03041e-16	3.73292e-14	ZHX1-C8orf76 readthrough	http://www.ncbi.nlm.nih.gov/gene/?term=100533106
ZHX2	protein_coding	chr8:123793901-123986755	+	10.1448	35.0752	1.78971	1.73619e-15	1.6778e-12	zinc fingers and homeoboxes 2	http://www.ncbi.nlm.nih.gov/gene/?term=22882
ZNF219	protein_coding	chr14:21558205-21572863	-	8.12516	17.6243	1.1171	1.11022e-15	1.58178e-13	zinc finger protein 219	http://www.ncbi.nlm.nih.gov/gene/?term=51222
ZNF565	protein_coding	chr19:36672962-36705986	-	6.80737	13.9463	1.03471	1.90883e-07	6.95919e-06	zinc finger protein 565	http://www.ncbi.nlm.nih.gov/gene/?term=147929
ZNF721	protein_coding	chr4:433773-492960	-	1.79664	4.64931	1.37171	2.69487e-07	9.3902e-06	zinc finger protein 721	http://www.ncbi.nlm.nih.gov/gene/?term=170960
ZNF74	protein_coding	chr22:20748405-20762753	+	6.97237	14.2477	1.031	2.86129e-11	2.3035e-09	zinc finger protein 74	http://www.ncbi.nlm.nih.gov/gene/?term=7625
